# Supplementary material for: Impact of Exposure to Chronic Light–Dark Phase Shifting Circadian Rhythm Disruption on Muscle Proteome in Periparturient Dairy Cows
Source: MDPI journal article supplement (doi:10.3390/proteomes9030035), 2021-07-29

Supplementary Figure S1A.

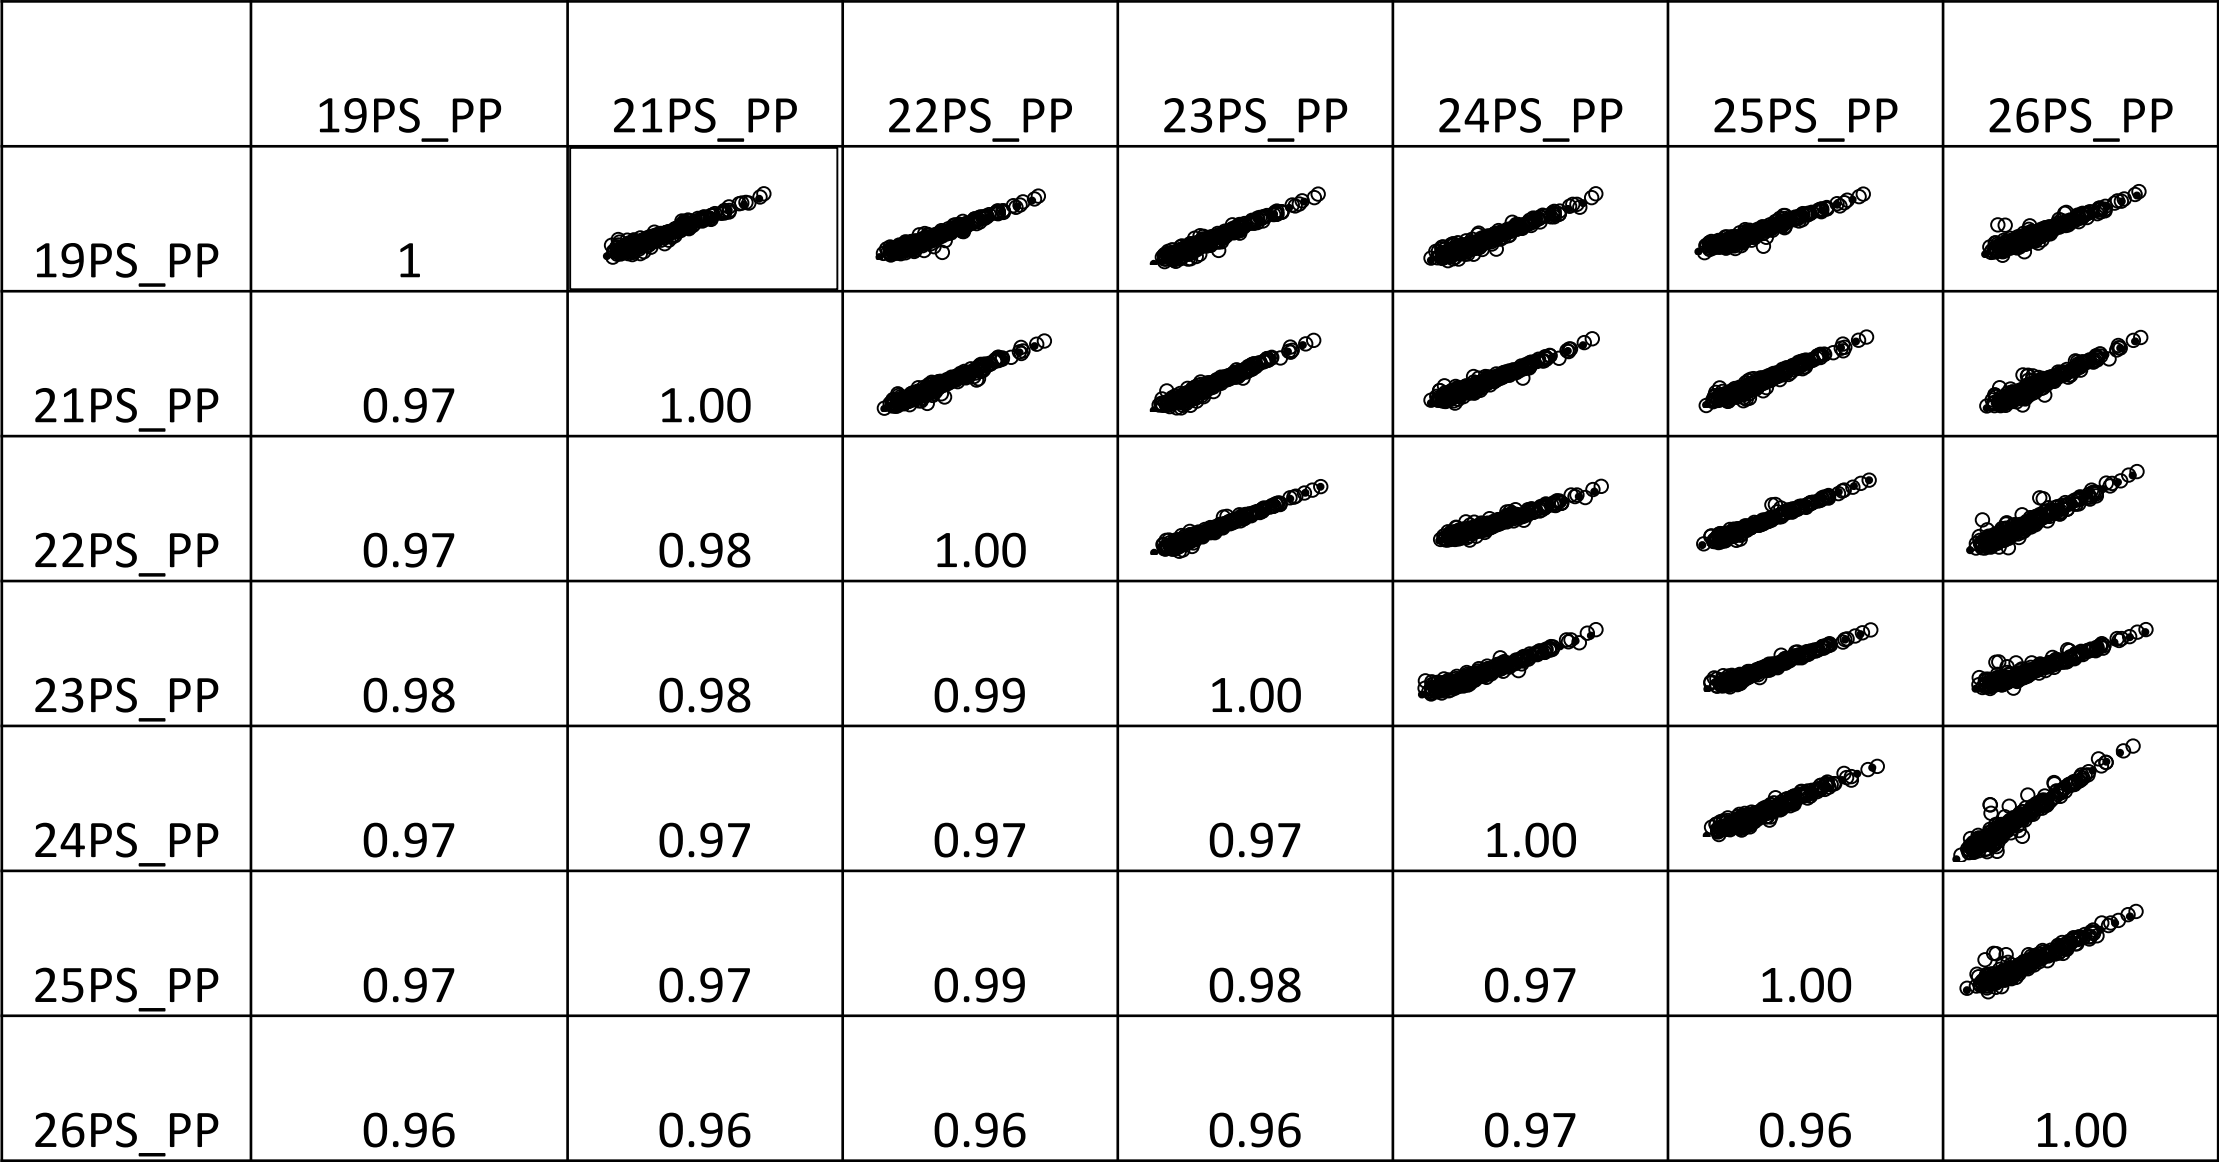

Supplementary Figure S1B.

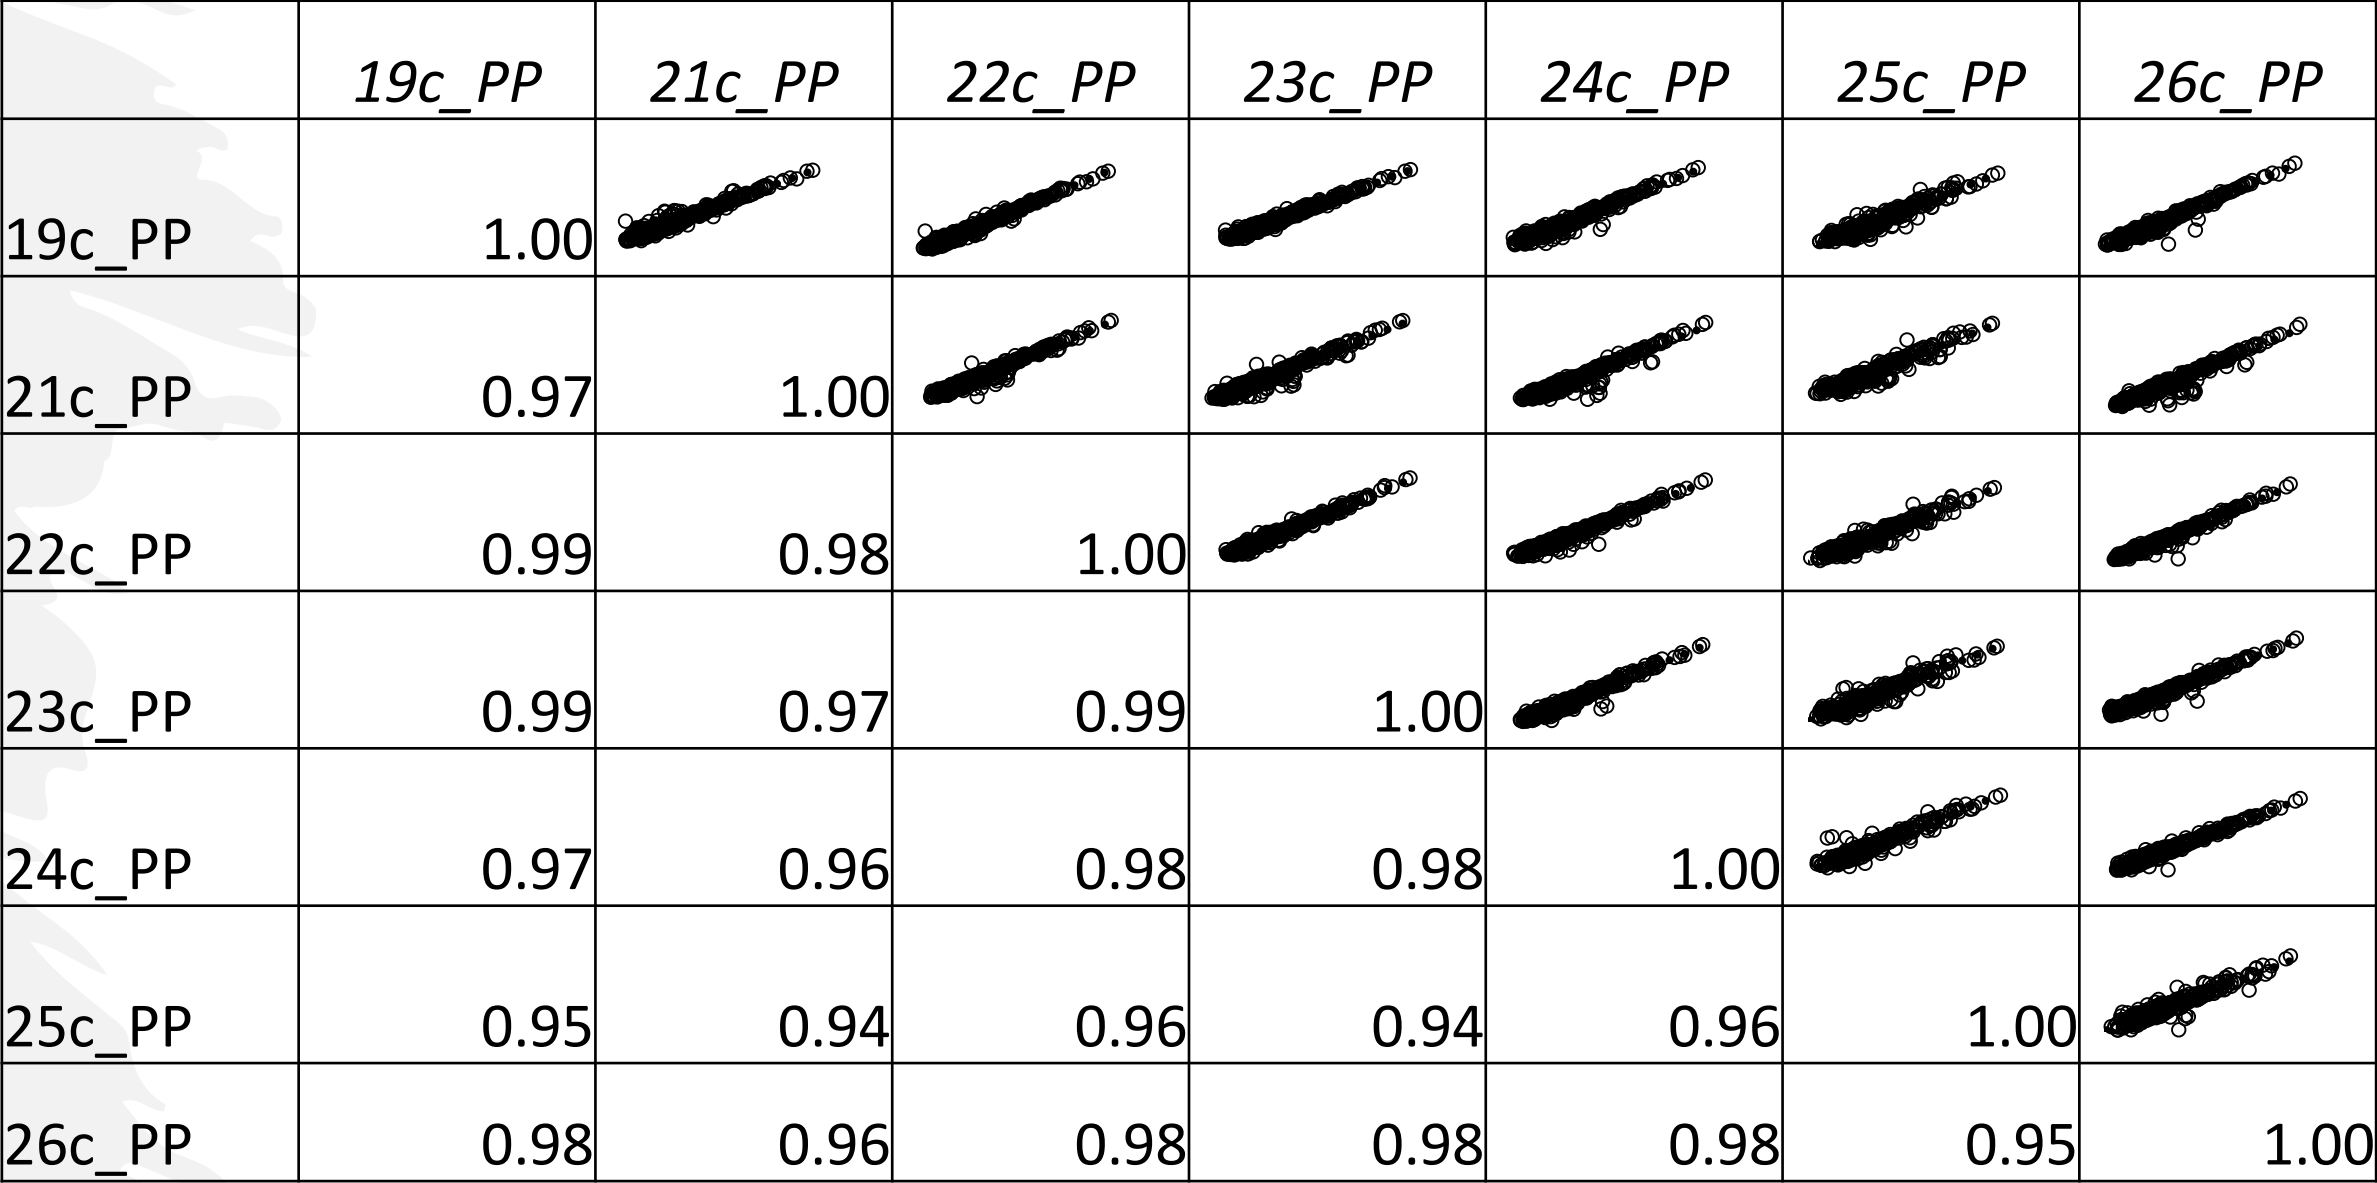

Supplementary Figure S1C.

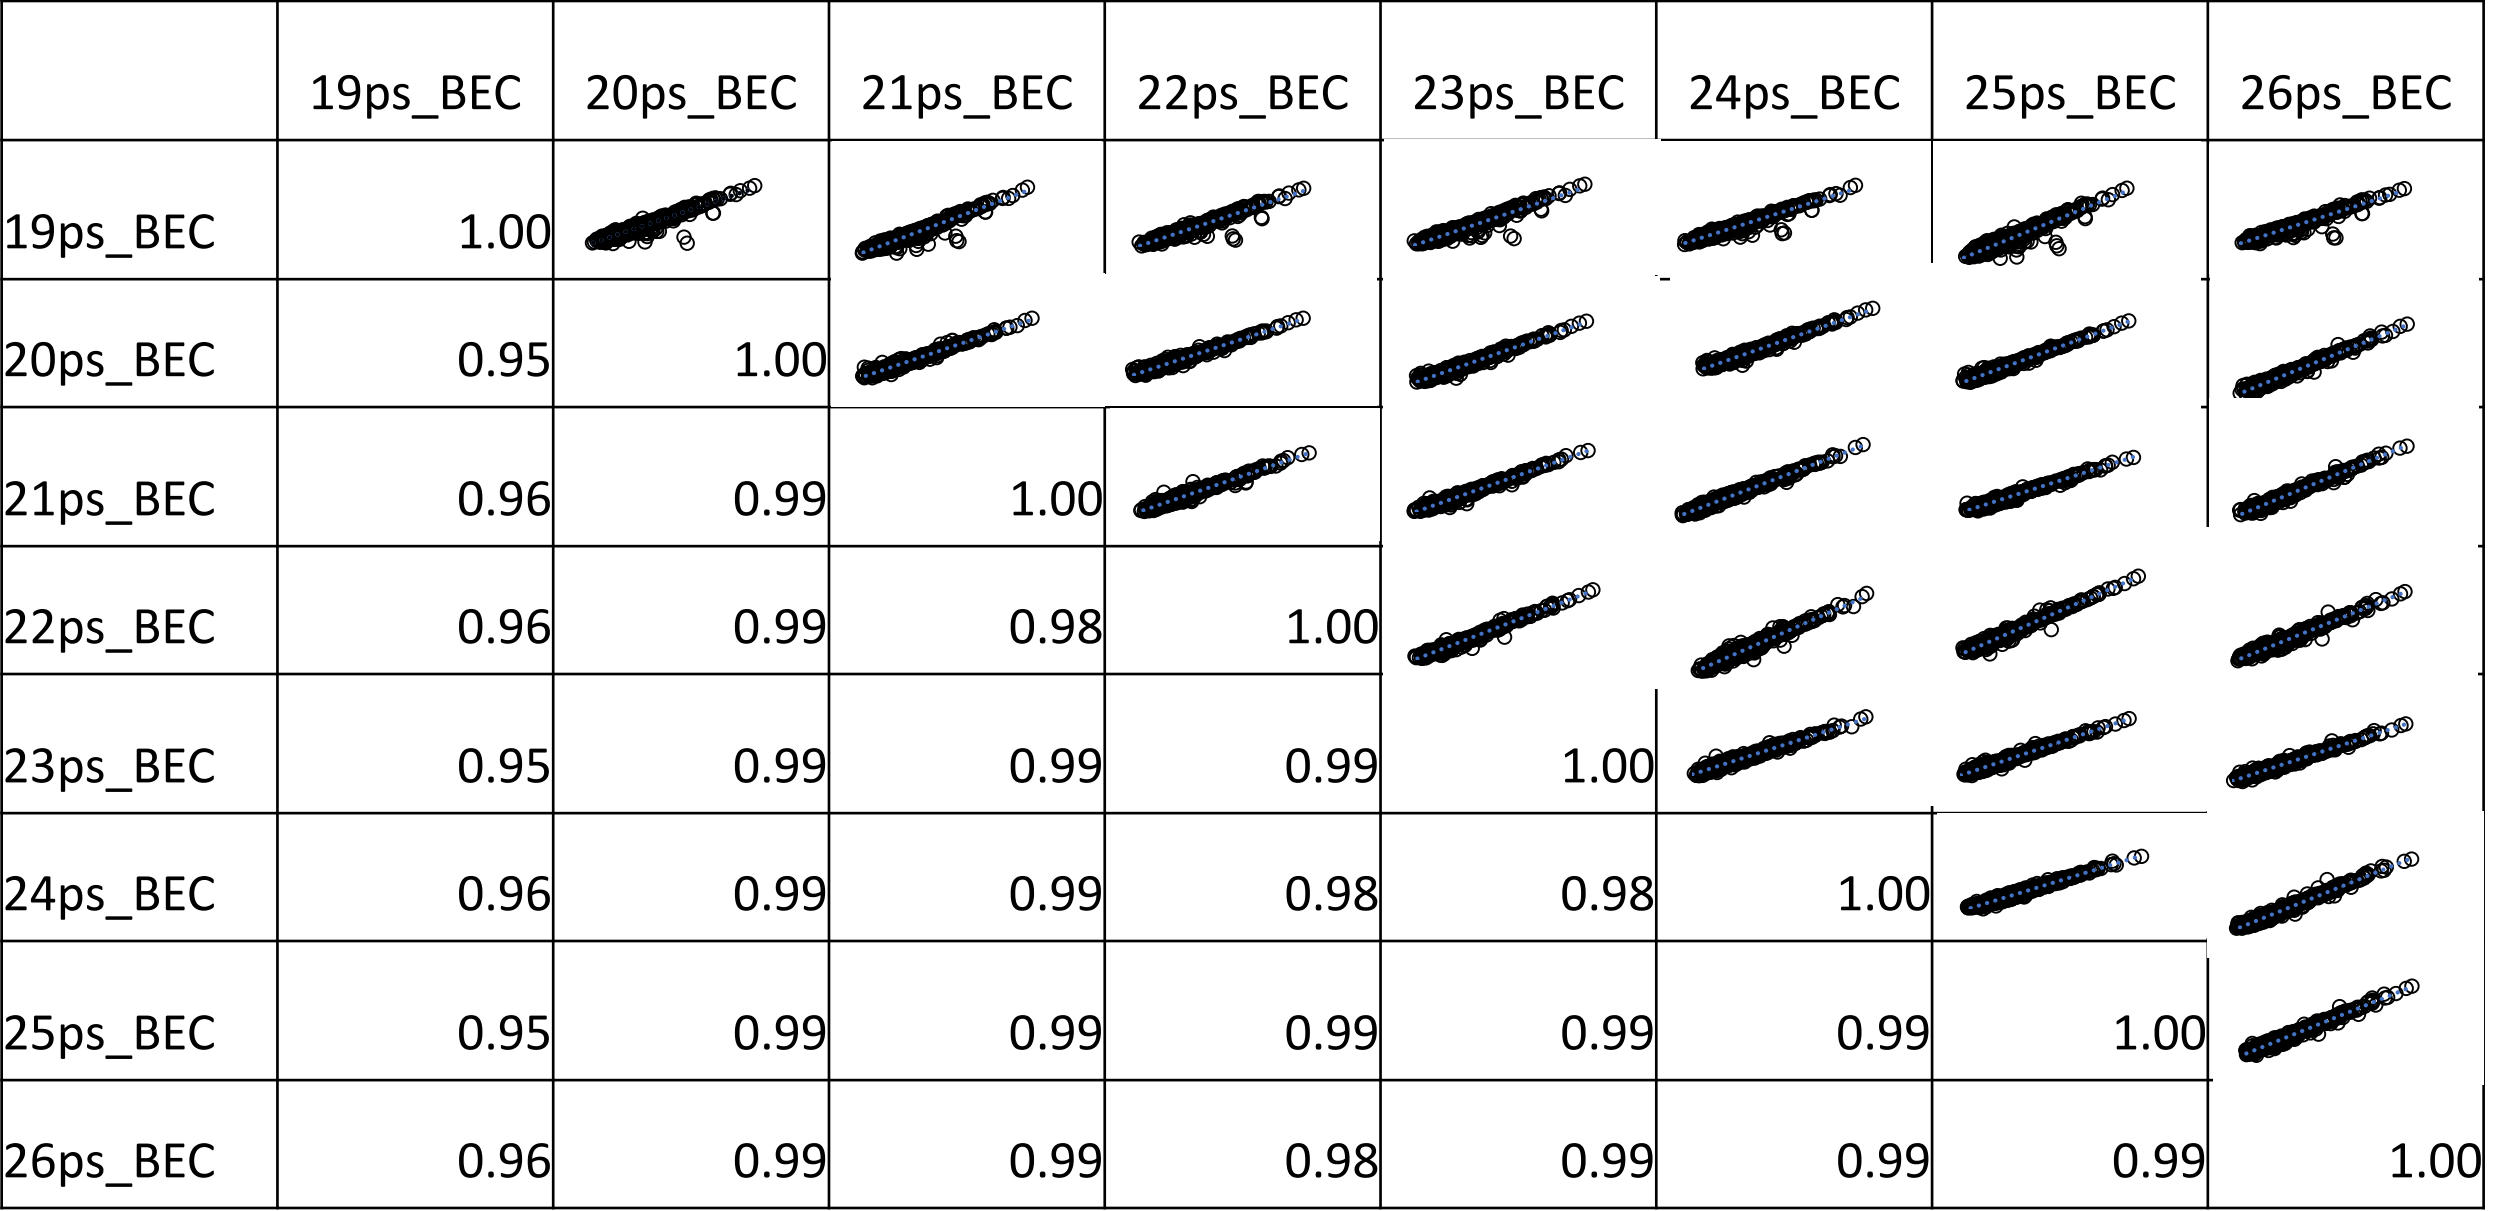

Supplementary Figure S1D.

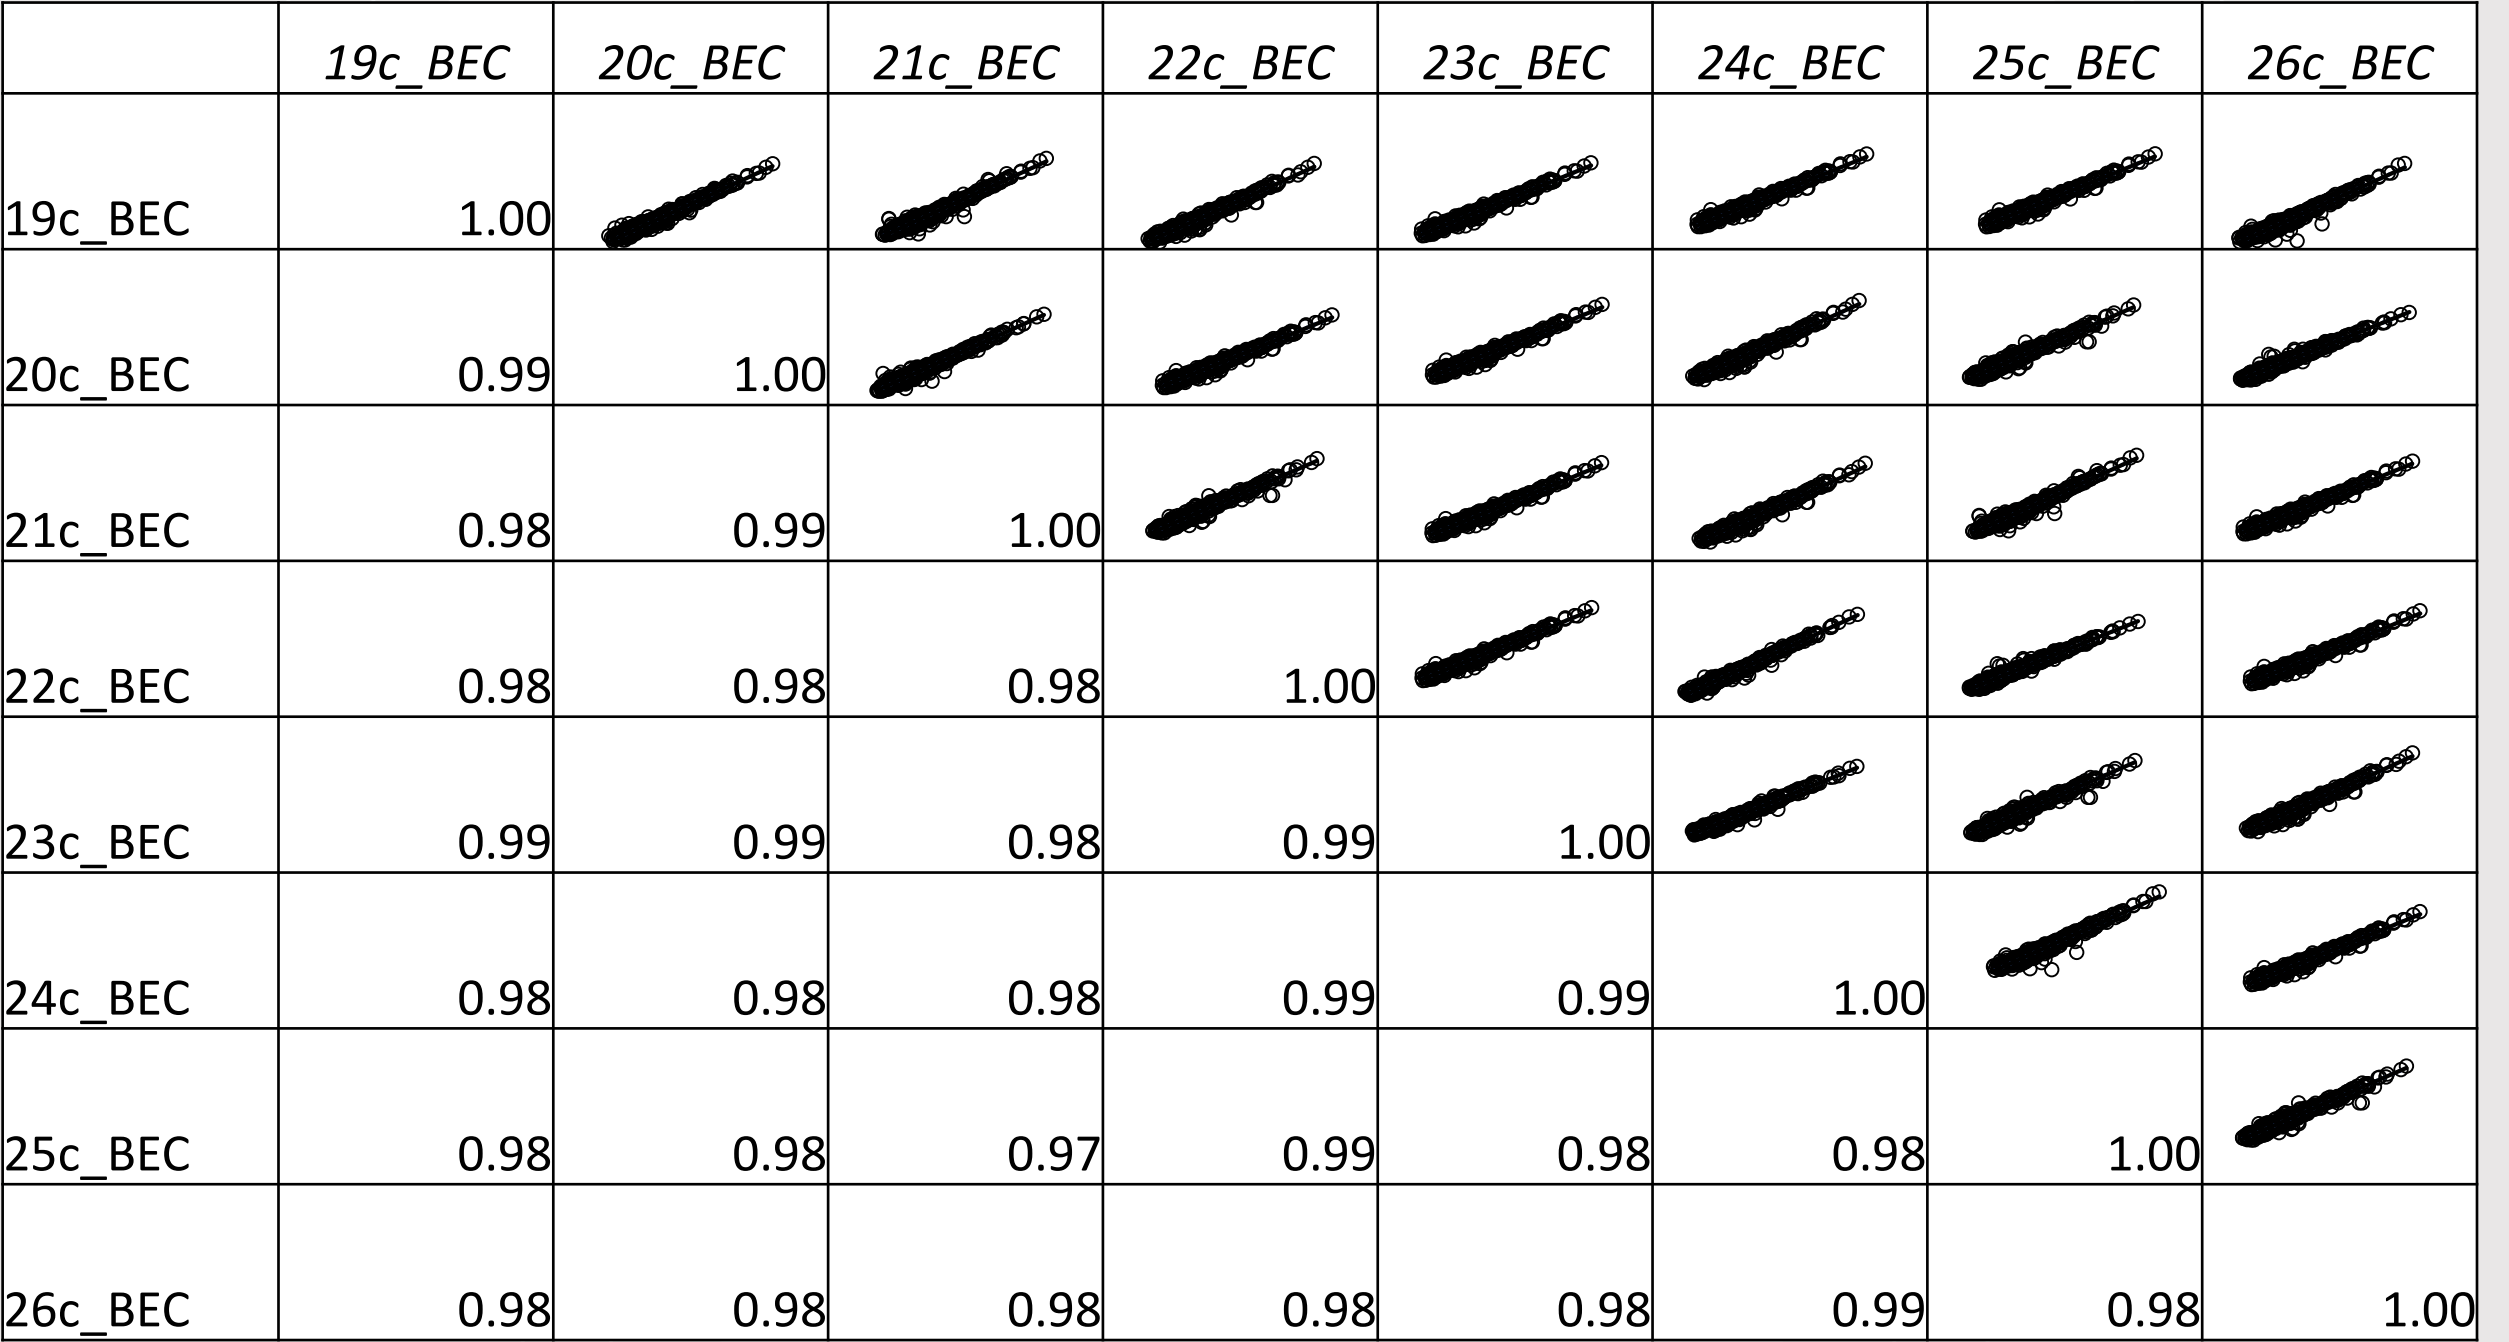

Supplement: s1 [file s1]
